# Supplementary material
Source: HighWire-hosted journal article supplement (https://www.rcpjournals.org/highwire/filestream/11647/field_highwire_adjunct_files/0/Hockey_Supplementary_material_S1.pdf)
Supplement: Hockey_Supplementary_material_S1.pdf [file Hockey_Supplementary_material_S1.pdf]

## **Task List**

---

### **Research & Learning**

- Taking part in a teaching/learning activity
- Academic research activities

### **Theatre**

- Assisting in theatre

### **Clinical (Patient Facing)**

- Discussion with patient in person
- Patient Examination
- Patient home visit
- Discussion with patient's relative in person
- Performing procedure on patient
- Taking patient history
- Outpatient clinic
- Taking blood
- Assisting with procedure under supervision
- Communicating patient information/care over telephone or email

### **Paperwork and Requests**

- Paperwork
- Requesting lab tests
- Requesting imaging
- Booking patient for theatre

### **Clinical (IT Facing)**

- Looking up information related to patient care
- Prescribing medication
- Responding to bleeps/emergency calls
- Reviewing/updating patient notes
- Checking imaging results
- Checking lab results

### **Commuting**

- Work related travel (excluding commuting)
- Commuting to/from home

### **Clinical (Colleague Facing)**

- Patient related discussion with colleagues
- Presenting patient to senior doctor
- Contacting medical staff over telephone

### **Non-clinical admin**

- Looking up information unrelated to patient care
- Non-patient related discussion with colleague

### **Break**

- Taking a break

### **Ward round**

- Ward round
-
